# Supplementary material for: Contact Toxicity, Antifeedant Activity, and Oviposition Preference of Osthole against Agricultural Pests
Source: MDPI journal article supplement (doi:10.3390/insects14090725), 2023-08-24
Supplement: s1 [file s1]

Table S1 Contents of the coumarins in CMC.

| Name               | Class                      | Contents (mg/g) |
|--------------------|----------------------------|-----------------|
| Osthole            | Simple coumarin            | 11.04 ± 0.87    |
| Imperatorin        | Linear furanocoumarin      | 3.41 ± 0.19     |
| Xanthotoxol        | Linear furanocoumarin      | 1.30 ± 0.085    |
| Isopimpinellin     | Linear furanocoumarin      | 0.64 ± 0.055    |
| 5-Methoxypsoralen  | Linear furanocoumarin      | 0.45 ± 0.030    |
| Methoxsalen        | Linear furanocoumarin      | 0.40 ± 0.027    |
| Meranzin (hydrate) | Simple coumarin            | 0.31 ± 0.025    |
| Auraptenol         | Simple coumarin            | 0.15 ± 0.0098   |
| Columbianadin      | Angular<br>furanocoumarins | 0.12 ± 0.0075   |
| Angelicin          | Angular furanocoumarin     | 0.060 ± 0.0044  |
| Isogosferol        | Linear furanocoumarin      | 0.011 ± 0.00053 |
